# Supplementary material for: Chemical composition of PM 2.5 in October 2017 Northern California wildfire plumes
Source: Copernicus journal article supplement (doi:10.5194/acp-21-5719-2021), 2021-04-15
Supplement: Supplementary file 2 [file acp-21-5719-2021-supplement.zip]

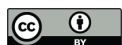

## *Supplement of*

# **Chemical composition of PM<sub>2.5</sub> in October 2017 Northern California wildfire plumes**

**Yutong Liang et al.**

*Correspondence to:* Yutong Liang (yutong.liang@berkeley.edu)

- acp-21-5719-2021-supplement-title-page.pdf
- Supplement revised
  - Napa Fire Supplement Draft 202101.pdf
  - Trained\_models\_Volatility\_OSc
    - \* trainedModel\_20200408\_OSc.mat
    - \* trainedModel\_20200408\_volatility.mat

The copyright of individual parts of the supplement might differ from the article licence.
